# Supplementary material for: Identification of MicroRNAs as Potential Biomarker for Gastric Cancer by System Biological Analysis
Source: Hindawi journal article supplement (doi:10.1155/2014/901428), 2014-01-01
Supplement: f1 [file 901428.f1.pdf]

**Clinical information for each sample**

| <b>GSM No.</b> | <b>Sex</b> | <b>Age</b> | <b>Type</b> | <b>Histologics</b> |
|----------------|------------|------------|-------------|--------------------|
| GSM907559      | M          | 74         | stage IV    | Diffuse            |
| GSM907569      | F          | 60         | stage IV    | Mixed              |
| GSM907570      | M          | 69         | stage IV    | Diffuse            |
| GSM907581      | M          | unknown    | stage IV    | unknown            |
| GSM907560      | M          | 63         | stage III   | Intestine          |
| GSM907576      | M          | 47         | stage III   | Intestine          |
| GSM907577      | M          | 61         | stage III   | Intestine          |
| GSM907579      | M          | 55         | stage III   | Diffuse            |
| GSM907580      | M          | 72         | stage III   | Diffuse            |
| GSM907561      | F          | 70         | stage II    | Diffuse            |
| GSM907566      | M          | 69         | stage II    | Diffuse            |
| GSM907571      | M          | 52         | stage II    | unknown            |
| GSM907574      | M          | 66         | stage II    | Intestine          |
| GSM907582      | M          | unknown    | stage II    | unknown            |
| GSM907558      | M          | 83         | stage I     | Mixed              |
| GSM907562      | M          | 76         | stage I     | Diffuse            |
| GSM907564      | M          | 61         | stage I     | Intestine          |
| GSM907573      | F          | 66         | stage I     | Diffuse            |
| GSM907578      | M          | 64         | stage I     | Diffuse            |
| GSM907563      | F          | 67         | Normal      | Normal             |
| GSM907565      | M          | 69         | Normal      | Normal             |
| GSM907567      | M          | 37         | Normal      | Normal             |
| GSM907568      | M          | 56         | Normal      | Normal             |
| GSM907572      | F          | 32         | Normal      | Normal             |
| GSM907575      | M          | 66         | Normal      | Normal             |

Ref: Kim, Y.H., et al., AMPKalpha modulation in cancer progression: multilayer integrative analysis of the

the whole transcriptome in Asian gastric cancer. *Cancer Res*, 2012. 72(10): p. 2512-21.
