# Supplementary material for: Identification of MicroRNAs as Potential Biomarker for Gastric Cancer by System Biological Analysis
Source: Hindawi journal article supplement (doi:10.1155/2014/901428), 2014-01-01
Supplement: f2 [file 901428.f2.pdf]

**GC Specific miRNA-mRNA Network**

| <b>miRNA</b> | <b>Gene</b> |
|--------------|-------------|
| let-7b       | IGF2BP1     |
| let-7b       | RASAL2      |
| let-7b       | RPP38       |
| let-7b       | PLAGL2      |
| miR-1        | RNF138      |
| miR-1        | PGM2        |
| miR-1        | COIL        |
| miR-1        | TPM3        |
| miR-1        | UHRF1       |
| miR-1        | TWF1        |
| miR-106a     | APP         |
| miR-10a      | GATA6       |
| miR-1226     | TSC22D3     |
| miR-129-3p   | HSPH1       |
| miR-135a     | PURB        |
| miR-140-3p   | AGPS        |
| miR-140-3p   | USP1        |
| miR-146b-3p  | FAM54B      |
| miR-17       | C1orf63     |
| miR-17       | GAB1        |
| miR-17       | TGFBR2      |
| miR-183      | BTG1        |
| miR-183      | PDCD4       |
| miR-18a      | CAMK2D      |
| miR-18a      | NR3C1       |
| miR-18a      | SMAD4       |
| miR-18a      | TGFBR2      |
| miR-18a      | TSC22D3     |
| miR-195      | SNRPB       |
| miR-195      | CCNE1       |
| miR-195      | E2F3        |
| miR-196b     | GATA6       |
| miR-196b     | MIA3        |
| miR-196b     | AKR1B10     |
| miR-19a      | C5orf32     |
| miR-19a      | SEC14L1     |
| miR-19a      | ATXN1       |
| miR-19a      | TGFBR2      |
| miR-202      | HPCAL1      |
| miR-204      | DUSP14      |
| miR-204      | VEZT        |
| miR-204      | CDC7        |

|         |          |
|---------|----------|
| miR-204 | CREB5    |
| miR-204 | E2F3     |
| miR-204 | FOXC1    |
| miR-204 | ZNF202   |
| miR-204 | HOXA10   |
| miR-20a | C1orf63  |
| miR-20b | ACPL2    |
| miR-211 | SLC4A1AP |
| miR-211 | LRRC8D   |
| miR-23a | CXCL12   |
| miR-25  | CCPG1    |
| miR-25  | ATXN1    |
| miR-25  | SLC38A2  |
| miR-25  | KLF11    |
| miR-25  | FNDC3A   |
| miR-25  | SERP1    |
| miR-25  | KAT2B    |
| miR-26a | C20orf24 |
| miR-26a | SFPQ     |
| miR-26a | HMGA1    |
| miR-26a | CDC6     |
| miR-29b | DYNLT1   |
| miR-29b | COL4A1   |
| miR-29c | COL1A2   |
| miR-30a | DHX9     |
| miR-30a | LMNB2    |
| miR-30a | THEM4    |
| miR-30a | TWF1     |
| miR-30c | CDC7     |
| miR-32  | RPN2     |
| miR-32  | MARCKSL1 |
| miR-32  | E2F3     |
| miR-32  | SIP1     |
| miR-32  | MYO1B    |
| miR-32  | MAST2    |
| miR-32  | NRF1     |
| miR-32  | TFAP2A   |
| miR-32  | COL1A2   |
| miR-32  | TGIF1    |
| miR-32  | CCT6A    |
| miR-32  | RCN1     |
| miR-32  | PA2G4    |
| miR-32  | PAXIP1   |
| miR-32  | HSPA5    |

|            |          |
|------------|----------|
| miR-32     | MRPL17   |
| miR-32     | SLC25A32 |
| miR-32     | SATB2    |
| miR-363    | TGIF1    |
| miR-363    | E2F3     |
| miR-363    | CCT6A    |
| miR-363    | AURKA    |
| miR-363    | FAM91A1  |
| miR-363    | SIP1     |
| miR-486-3p | NPR2     |
| miR-488    | PGRMC2   |
| miR-490-5p | DUSP14   |
| miR-551b   | RAD21    |
| miR-574-3p | E2F3     |
| miR-574-3p | SERPINH1 |
| miR-574-3p | E2F1     |
| miR-582-5p | NOTCH1   |
| miR-618    | MEGF9    |
| miR-625    | SAMD4A   |
| miR-625    | SYNJ2    |
| miR-625    | RASAL2   |
| miR-625    | NDP      |
| miR-625    | FAM60A   |
| miR-628-5p | COL4A1   |
| miR-641    | UGCG     |
| miR-642    | CANX     |
| miR-642    | ADAMTS6  |
| miR-708    | B4GALT3  |
| miR-708    | NRG1     |
| miR-766    | COIL     |
| miR-766    | FAM98A   |
| miR-873    | USP1     |
| miR-874    | ISG20L2  |
| miR-874    | FADS1    |
| miR-874    | PLOD3    |
| miR-874    | HDAC1    |
| miR-874    | E2F1     |
| miR-874    | BMP1     |
| miR-874    | RASAL2   |
| miR-874    | E2F3     |
| miR-874    | CANX     |
| miR-876-5p | CLSPN    |
| miR-93     | TLE4     |
| miR-93     | EPB41    |

|        |          |
|--------|----------|
| miR-93 | KLF9     |
| miR-93 | MTERFD2  |
| miR-93 | BTG1     |
| miR-93 | KIAA0513 |
| miR-93 | SAPS2    |
| miR-93 | C1orf63  |
| miR-93 | CRY2     |
| miR-93 | FAM129A  |
| miR-93 | FAM117A  |
| miR-93 | ABCC5    |
| miR-93 | CYBRD1   |
| miR-93 | TNFAIP8  |
