# Supplementary material for: Identification of MicroRNAs as Potential Biomarker for Gastric Cancer by System Biological Analysis
Source: Hindawi journal article supplement (doi:10.1155/2014/901428), 2014-01-01
Supplement: f3 [file 901428.f3.pdf]

**Enriched Functional Themes for Target Genes of Candidate miRNAs**

| <b>GO_Biology process (pvalue&lt;0.05, FDR&lt;0.05)</b>                | <b>GO_Molecular function (pvalue&lt;0.05, FDR&lt;0.05)</b> |
|------------------------------------------------------------------------|------------------------------------------------------------|
| GO:0051252~regulation of RNA metabolic process                         | GO:0030528~transcription regulator activity                |
| GO:0006357~regulation of transcription from RNA polymerase II promoter | GO:0003700~transcription factor activity                   |
| GO:0006355~regulation of transcription, DNA-dependent                  |                                                            |
| GO:0045449~regulation of transcription                                 |                                                            |
|                                                                        |                                                            |
|                                                                        |                                                            |
|                                                                        |                                                            |

| <b>GO_Cellular component (pvalue&lt;0.05, FDR&lt;0.05)</b> | <b>KEGG (pvalue&lt;0.05)</b>      |
|------------------------------------------------------------|-----------------------------------|
| GO:0031981~nuclear lumen                                   | hsa04110:Cell cycle               |
| GO:0070013~intracellular organelle lumen                   | hsa05220:Chronic myeloid leukemia |
| GO:0043233~organelle lumen                                 | hsa05212:Pancreatic cancer        |
| GO:0031974~membrane-enclosed lumen                         | hsa05200:Pathways in cancer       |
| GO:0005654~nucleoplasm                                     | hsa05215:Prostate cancer          |
| GO:0044451~nucleoplasm part                                |                                   |
|                                                            |                                   |

|                                                    |
|----------------------------------------------------|
| <b>MetaCore Pathway Maps</b>                       |
| Start of DNA replication in early S phase          |
| Cell cycle (generic schema)                        |
| Glucocorticoid receptor signaling                  |
| Ligand-dependent activation of the ESR1/SP pathway |
| TGF-beta-dependent induction of EMT via SMADs      |
| Regulation of G1/S transition (part 1)             |
| Notch Signaling Pathway                            |
