# Supplementary material for: Identification of MicroRNAs as Potential Biomarker for Gastric Cancer by System Biological Analysis
Source: Hindawi journal article supplement (doi:10.1155/2014/901428), 2014-01-01
Supplement: f4 [file 901428.f4.pdf]

Enriched MetaCore P

| miRNAs Target Genes Enriched MetaCore Pathway        | Pubmed citation Number | GC related Genes in the pathway |
|------------------------------------------------------|------------------------|---------------------------------|
| Cell cycle_Start of DNA replication in early S phase | 37                     | CCNE1                           |
|                                                      |                        | CDC6                            |
|                                                      |                        | CDK2                            |
|                                                      |                        | E2F1                            |
|                                                      |                        | MCM2                            |
|                                                      |                        | MCM4                            |
|                                                      |                        | MCM5                            |
|                                                      |                        | MCM7                            |
|                                                      |                        | ORC1                            |
|                                                      |                        | RPA3                            |
| Cell cycle_Cell cycle (generic schema)               | 75                     | CCNA2                           |
|                                                      |                        | CCNB1                           |
|                                                      |                        | CCND1                           |
|                                                      |                        | CCND2                           |
|                                                      |                        | CCND3                           |
|                                                      |                        | CCNE1                           |
|                                                      |                        | CDC25A                          |
|                                                      |                        | CDC25B                          |
|                                                      |                        | CDC25C                          |
|                                                      |                        | CDK1                            |
|                                                      |                        | CDK2                            |
|                                                      |                        | CDK4                            |
|                                                      |                        | CDK6                            |
|                                                      |                        | E2F1                            |
|                                                      |                        | E2F2                            |
|                                                      |                        | E2F3                            |
| RB1                                                  |                        |                                 |
| RBL2                                                 |                        |                                 |
| Glucocorticoid receptor signaling                    | 76                     | CEBPB                           |
|                                                      |                        | FOS                             |
|                                                      |                        | HSP90AA1                        |
|                                                      |                        | HSP90AB1                        |
|                                                      |                        | HSP90B1                         |
|                                                      |                        | HSPA14                          |
|                                                      |                        | HSPA1A                          |
|                                                      |                        | HSPA1B                          |
|                                                      |                        | HSPA1L                          |
|                                                      |                        | HSPA4                           |
|                                                      |                        | HSPA5                           |
|                                                      |                        | HSPA8                           |
|                                                      |                        | JUN                             |
|                                                      |                        | MMP13                           |
|                                                      |                        | NFKB1                           |
|                                                      |                        | NFKB2                           |
| NFKBIA                                               |                        |                                 |
| NR3C1                                                |                        |                                 |

|                                                    |     |          |
|----------------------------------------------------|-----|----------|
|                                                    |     | POU2F1   |
|                                                    |     | POU2F2   |
|                                                    |     | PTGES3   |
|                                                    |     | RELA     |
|                                                    |     | SERPINE1 |
|                                                    |     | SMAD3    |
|                                                    |     | STAT5A   |
|                                                    |     | STAT5B   |
|                                                    |     | TGFBR1   |
| Ligand-dependent activation of the ESR1/SP pathway | 319 | ACTB     |
|                                                    |     | ADA      |
|                                                    |     | CAD      |
|                                                    |     | CCND1    |
|                                                    |     | CCNE1    |
|                                                    |     | CDC25A   |
|                                                    |     | CEBPB    |
|                                                    |     | E2F1     |
|                                                    |     | EGFR     |
|                                                    |     | ESR1     |
|                                                    |     | FOS      |
|                                                    |     | HIF1A    |
|                                                    |     | LDLR     |
|                                                    |     | NCOA3    |
|                                                    |     | SMARCA2  |
|                                                    |     | SMARCA4  |
|                                                    |     | SMARCB1  |
|                                                    |     | SP1      |
|                                                    |     | TYMS     |
|                                                    |     | VEGFA    |
|                                                    |     | CDH1     |
|                                                    |     | CDH2     |
|                                                    |     | CLDN1    |

|                                               |     |                                                                                                                                                                                                                                                                                                                                                                                                                                                                                                                                                                                                                                             |        |       |       |       |       |       |        |       |          |       |       |       |        |        |        |        |       |       |       |        |        |        |     |      |      |
|-----------------------------------------------|-----|---------------------------------------------------------------------------------------------------------------------------------------------------------------------------------------------------------------------------------------------------------------------------------------------------------------------------------------------------------------------------------------------------------------------------------------------------------------------------------------------------------------------------------------------------------------------------------------------------------------------------------------------|--------|-------|-------|-------|-------|-------|--------|-------|----------|-------|-------|-------|--------|--------|--------|--------|-------|-------|-------|--------|--------|--------|-----|------|------|
| TGF-beta-dependent induction of EMT via SMADs | 292 | <table border="1"> <tr><td>ETS1</td></tr> <tr><td>FN1</td></tr> <tr><td>HMGA2</td></tr> <tr><td>ILK</td></tr> <tr><td>JAG1</td></tr> <tr><td>MMP2</td></tr> <tr><td>NOTCH1</td></tr> <tr><td>OCLN</td></tr> <tr><td>SERPINE1</td></tr> <tr><td>SMAD2</td></tr> <tr><td>SMAD3</td></tr> <tr><td>SMAD4</td></tr> <tr><td>SNAI1</td></tr> <tr><td>SNAI2</td></tr> <tr><td>SP1</td></tr> <tr><td>TCF3</td></tr> <tr><td>TGFB1</td></tr> <tr><td>TGFB2</td></tr> <tr><td>TGFB3</td></tr> <tr><td>TGFBR1</td></tr> <tr><td>TGFBR2</td></tr> <tr><td>TWIST1</td></tr> <tr><td>VIM</td></tr> <tr><td>ZEB1</td></tr> <tr><td>ZEB2</td></tr> </table> | ETS1   | FN1   | HMGA2 | ILK   | JAG1  | MMP2  | NOTCH1 | OCLN  | SERPINE1 | SMAD2 | SMAD3 | SMAD4 | SNAI1  | SNAI2  | SP1    | TCF3   | TGFB1 | TGFB2 | TGFB3 | TGFBR1 | TGFBR2 | TWIST1 | VIM | ZEB1 | ZEB2 |
| ETS1                                          |     |                                                                                                                                                                                                                                                                                                                                                                                                                                                                                                                                                                                                                                             |        |       |       |       |       |       |        |       |          |       |       |       |        |        |        |        |       |       |       |        |        |        |     |      |      |
| FN1                                           |     |                                                                                                                                                                                                                                                                                                                                                                                                                                                                                                                                                                                                                                             |        |       |       |       |       |       |        |       |          |       |       |       |        |        |        |        |       |       |       |        |        |        |     |      |      |
| HMGA2                                         |     |                                                                                                                                                                                                                                                                                                                                                                                                                                                                                                                                                                                                                                             |        |       |       |       |       |       |        |       |          |       |       |       |        |        |        |        |       |       |       |        |        |        |     |      |      |
| ILK                                           |     |                                                                                                                                                                                                                                                                                                                                                                                                                                                                                                                                                                                                                                             |        |       |       |       |       |       |        |       |          |       |       |       |        |        |        |        |       |       |       |        |        |        |     |      |      |
| JAG1                                          |     |                                                                                                                                                                                                                                                                                                                                                                                                                                                                                                                                                                                                                                             |        |       |       |       |       |       |        |       |          |       |       |       |        |        |        |        |       |       |       |        |        |        |     |      |      |
| MMP2                                          |     |                                                                                                                                                                                                                                                                                                                                                                                                                                                                                                                                                                                                                                             |        |       |       |       |       |       |        |       |          |       |       |       |        |        |        |        |       |       |       |        |        |        |     |      |      |
| NOTCH1                                        |     |                                                                                                                                                                                                                                                                                                                                                                                                                                                                                                                                                                                                                                             |        |       |       |       |       |       |        |       |          |       |       |       |        |        |        |        |       |       |       |        |        |        |     |      |      |
| OCLN                                          |     |                                                                                                                                                                                                                                                                                                                                                                                                                                                                                                                                                                                                                                             |        |       |       |       |       |       |        |       |          |       |       |       |        |        |        |        |       |       |       |        |        |        |     |      |      |
| SERPINE1                                      |     |                                                                                                                                                                                                                                                                                                                                                                                                                                                                                                                                                                                                                                             |        |       |       |       |       |       |        |       |          |       |       |       |        |        |        |        |       |       |       |        |        |        |     |      |      |
| SMAD2                                         |     |                                                                                                                                                                                                                                                                                                                                                                                                                                                                                                                                                                                                                                             |        |       |       |       |       |       |        |       |          |       |       |       |        |        |        |        |       |       |       |        |        |        |     |      |      |
| SMAD3                                         |     |                                                                                                                                                                                                                                                                                                                                                                                                                                                                                                                                                                                                                                             |        |       |       |       |       |       |        |       |          |       |       |       |        |        |        |        |       |       |       |        |        |        |     |      |      |
| SMAD4                                         |     |                                                                                                                                                                                                                                                                                                                                                                                                                                                                                                                                                                                                                                             |        |       |       |       |       |       |        |       |          |       |       |       |        |        |        |        |       |       |       |        |        |        |     |      |      |
| SNAI1                                         |     |                                                                                                                                                                                                                                                                                                                                                                                                                                                                                                                                                                                                                                             |        |       |       |       |       |       |        |       |          |       |       |       |        |        |        |        |       |       |       |        |        |        |     |      |      |
| SNAI2                                         |     |                                                                                                                                                                                                                                                                                                                                                                                                                                                                                                                                                                                                                                             |        |       |       |       |       |       |        |       |          |       |       |       |        |        |        |        |       |       |       |        |        |        |     |      |      |
| SP1                                           |     |                                                                                                                                                                                                                                                                                                                                                                                                                                                                                                                                                                                                                                             |        |       |       |       |       |       |        |       |          |       |       |       |        |        |        |        |       |       |       |        |        |        |     |      |      |
| TCF3                                          |     |                                                                                                                                                                                                                                                                                                                                                                                                                                                                                                                                                                                                                                             |        |       |       |       |       |       |        |       |          |       |       |       |        |        |        |        |       |       |       |        |        |        |     |      |      |
| TGFB1                                         |     |                                                                                                                                                                                                                                                                                                                                                                                                                                                                                                                                                                                                                                             |        |       |       |       |       |       |        |       |          |       |       |       |        |        |        |        |       |       |       |        |        |        |     |      |      |
| TGFB2                                         |     |                                                                                                                                                                                                                                                                                                                                                                                                                                                                                                                                                                                                                                             |        |       |       |       |       |       |        |       |          |       |       |       |        |        |        |        |       |       |       |        |        |        |     |      |      |
| TGFB3                                         |     |                                                                                                                                                                                                                                                                                                                                                                                                                                                                                                                                                                                                                                             |        |       |       |       |       |       |        |       |          |       |       |       |        |        |        |        |       |       |       |        |        |        |     |      |      |
| TGFBR1                                        |     |                                                                                                                                                                                                                                                                                                                                                                                                                                                                                                                                                                                                                                             |        |       |       |       |       |       |        |       |          |       |       |       |        |        |        |        |       |       |       |        |        |        |     |      |      |
| TGFBR2                                        |     |                                                                                                                                                                                                                                                                                                                                                                                                                                                                                                                                                                                                                                             |        |       |       |       |       |       |        |       |          |       |       |       |        |        |        |        |       |       |       |        |        |        |     |      |      |
| TWIST1                                        |     |                                                                                                                                                                                                                                                                                                                                                                                                                                                                                                                                                                                                                                             |        |       |       |       |       |       |        |       |          |       |       |       |        |        |        |        |       |       |       |        |        |        |     |      |      |
| VIM                                           |     |                                                                                                                                                                                                                                                                                                                                                                                                                                                                                                                                                                                                                                             |        |       |       |       |       |       |        |       |          |       |       |       |        |        |        |        |       |       |       |        |        |        |     |      |      |
| ZEB1                                          |     |                                                                                                                                                                                                                                                                                                                                                                                                                                                                                                                                                                                                                                             |        |       |       |       |       |       |        |       |          |       |       |       |        |        |        |        |       |       |       |        |        |        |     |      |      |
| ZEB2                                          |     |                                                                                                                                                                                                                                                                                                                                                                                                                                                                                                                                                                                                                                             |        |       |       |       |       |       |        |       |          |       |       |       |        |        |        |        |       |       |       |        |        |        |     |      |      |
| Regulation of G1/S transition (part 1)        | 238 | <table border="1"> <tr><td>ANAPC1</td></tr> <tr><td>BRCA1</td></tr> <tr><td>BTRC</td></tr> <tr><td>CCNA2</td></tr> <tr><td>CCND1</td></tr> <tr><td>CCND2</td></tr> <tr><td>CCND3</td></tr> <tr><td>CCNE1</td></tr> <tr><td>CDC25A</td></tr> <tr><td>CDK2</td></tr> <tr><td>CDK4</td></tr> <tr><td>CDK6</td></tr> <tr><td>CDKN1A</td></tr> <tr><td>CDKN1B</td></tr> <tr><td>CDKN2A</td></tr> <tr><td>CDKN2B</td></tr> <tr><td>CHEK2</td></tr> <tr><td>CUL1</td></tr> <tr><td>FBXW7</td></tr> </table>                                                                                                                                        | ANAPC1 | BRCA1 | BTRC  | CCNA2 | CCND1 | CCND2 | CCND3  | CCNE1 | CDC25A   | CDK2  | CDK4  | CDK6  | CDKN1A | CDKN1B | CDKN2A | CDKN2B | CHEK2 | CUL1  | FBXW7 |        |        |        |     |      |      |
| ANAPC1                                        |     |                                                                                                                                                                                                                                                                                                                                                                                                                                                                                                                                                                                                                                             |        |       |       |       |       |       |        |       |          |       |       |       |        |        |        |        |       |       |       |        |        |        |     |      |      |
| BRCA1                                         |     |                                                                                                                                                                                                                                                                                                                                                                                                                                                                                                                                                                                                                                             |        |       |       |       |       |       |        |       |          |       |       |       |        |        |        |        |       |       |       |        |        |        |     |      |      |
| BTRC                                          |     |                                                                                                                                                                                                                                                                                                                                                                                                                                                                                                                                                                                                                                             |        |       |       |       |       |       |        |       |          |       |       |       |        |        |        |        |       |       |       |        |        |        |     |      |      |
| CCNA2                                         |     |                                                                                                                                                                                                                                                                                                                                                                                                                                                                                                                                                                                                                                             |        |       |       |       |       |       |        |       |          |       |       |       |        |        |        |        |       |       |       |        |        |        |     |      |      |
| CCND1                                         |     |                                                                                                                                                                                                                                                                                                                                                                                                                                                                                                                                                                                                                                             |        |       |       |       |       |       |        |       |          |       |       |       |        |        |        |        |       |       |       |        |        |        |     |      |      |
| CCND2                                         |     |                                                                                                                                                                                                                                                                                                                                                                                                                                                                                                                                                                                                                                             |        |       |       |       |       |       |        |       |          |       |       |       |        |        |        |        |       |       |       |        |        |        |     |      |      |
| CCND3                                         |     |                                                                                                                                                                                                                                                                                                                                                                                                                                                                                                                                                                                                                                             |        |       |       |       |       |       |        |       |          |       |       |       |        |        |        |        |       |       |       |        |        |        |     |      |      |
| CCNE1                                         |     |                                                                                                                                                                                                                                                                                                                                                                                                                                                                                                                                                                                                                                             |        |       |       |       |       |       |        |       |          |       |       |       |        |        |        |        |       |       |       |        |        |        |     |      |      |
| CDC25A                                        |     |                                                                                                                                                                                                                                                                                                                                                                                                                                                                                                                                                                                                                                             |        |       |       |       |       |       |        |       |          |       |       |       |        |        |        |        |       |       |       |        |        |        |     |      |      |
| CDK2                                          |     |                                                                                                                                                                                                                                                                                                                                                                                                                                                                                                                                                                                                                                             |        |       |       |       |       |       |        |       |          |       |       |       |        |        |        |        |       |       |       |        |        |        |     |      |      |
| CDK4                                          |     |                                                                                                                                                                                                                                                                                                                                                                                                                                                                                                                                                                                                                                             |        |       |       |       |       |       |        |       |          |       |       |       |        |        |        |        |       |       |       |        |        |        |     |      |      |
| CDK6                                          |     |                                                                                                                                                                                                                                                                                                                                                                                                                                                                                                                                                                                                                                             |        |       |       |       |       |       |        |       |          |       |       |       |        |        |        |        |       |       |       |        |        |        |     |      |      |
| CDKN1A                                        |     |                                                                                                                                                                                                                                                                                                                                                                                                                                                                                                                                                                                                                                             |        |       |       |       |       |       |        |       |          |       |       |       |        |        |        |        |       |       |       |        |        |        |     |      |      |
| CDKN1B                                        |     |                                                                                                                                                                                                                                                                                                                                                                                                                                                                                                                                                                                                                                             |        |       |       |       |       |       |        |       |          |       |       |       |        |        |        |        |       |       |       |        |        |        |     |      |      |
| CDKN2A                                        |     |                                                                                                                                                                                                                                                                                                                                                                                                                                                                                                                                                                                                                                             |        |       |       |       |       |       |        |       |          |       |       |       |        |        |        |        |       |       |       |        |        |        |     |      |      |
| CDKN2B                                        |     |                                                                                                                                                                                                                                                                                                                                                                                                                                                                                                                                                                                                                                             |        |       |       |       |       |       |        |       |          |       |       |       |        |        |        |        |       |       |       |        |        |        |     |      |      |
| CHEK2                                         |     |                                                                                                                                                                                                                                                                                                                                                                                                                                                                                                                                                                                                                                             |        |       |       |       |       |       |        |       |          |       |       |       |        |        |        |        |       |       |       |        |        |        |     |      |      |
| CUL1                                          |     |                                                                                                                                                                                                                                                                                                                                                                                                                                                                                                                                                                                                                                             |        |       |       |       |       |       |        |       |          |       |       |       |        |        |        |        |       |       |       |        |        |        |     |      |      |
| FBXW7                                         |     |                                                                                                                                                                                                                                                                                                                                                                                                                                                                                                                                                                                                                                             |        |       |       |       |       |       |        |       |          |       |       |       |        |        |        |        |       |       |       |        |        |        |     |      |      |

|                         |    |          |
|-------------------------|----|----------|
|                         |    | GSK3B    |
|                         |    | PPP2R3A  |
|                         |    | RPS6KB1  |
|                         |    | SKP2     |
|                         |    | SMAD2    |
|                         |    | SMAD3    |
|                         |    | SMAD4    |
|                         |    | SP1      |
|                         |    | TGFB1    |
|                         |    | TGFB2    |
|                         |    | TGFBR1   |
|                         |    | TGFBR2   |
|                         |    | UBB      |
|                         |    | UBC      |
|                         |    | CUL1     |
|                         |    | FBXW7    |
|                         |    | H3F3A    |
|                         |    | H3F3B    |
|                         |    | HDAC1    |
|                         |    | HDAC2    |
|                         |    | HES1     |
|                         |    | HIST1H4A |
|                         |    | HIST1H4B |
|                         |    | HIST1H4C |
|                         |    | HIST1H4D |
|                         |    | HIST1H4E |
|                         |    | HIST1H4F |
|                         |    | HIST1H4H |
|                         |    | HIST1H4I |
|                         |    | HIST1H4J |
|                         |    | HIST1H4K |
|                         |    | HIST1H4L |
|                         |    | HIST2H4A |
|                         |    | HIST2H4B |
|                         |    | HIST3H3  |
|                         |    | HIST4H4  |
|                         |    | JAG1     |
|                         |    | JAG2     |
|                         |    | MFNG     |
|                         |    | MYOD1    |
|                         |    | NFKBIA   |
|                         |    | NOTCH1   |
|                         |    | RBBP4    |
|                         |    | TP73     |
| Notch Signaling Pathway | 29 |          |

**Pathways and Constituent GC-Related Objects**

| PMID                                                                                                                                                                                                                                                                                                                                                                |
|---------------------------------------------------------------------------------------------------------------------------------------------------------------------------------------------------------------------------------------------------------------------------------------------------------------------------------------------------------------------|
| 10218458,10547573,10666388,11002215,11038303,11059220,12064799,12133540,12493027,12667381,12799636,15746045,16270527,16575401,18841391,19058005,19096232,19569046,20965966,7559076,9242335,9529014,981118117151793,17229543                                                                                                                                         |
| 10666388,12667381,17366642                                                                                                                                                                                                                                                                                                                                          |
| 10225440,15701848,                                                                                                                                                                                                                                                                                                                                                  |
| 11782383,18373176,20694513,20965966                                                                                                                                                                                                                                                                                                                                 |
| 20965966                                                                                                                                                                                                                                                                                                                                                            |
| 20694513                                                                                                                                                                                                                                                                                                                                                            |
| 20965966                                                                                                                                                                                                                                                                                                                                                            |
| 20965966                                                                                                                                                                                                                                                                                                                                                            |
| 17229543                                                                                                                                                                                                                                                                                                                                                            |
| 20334896,20525401                                                                                                                                                                                                                                                                                                                                                   |
| 12200597,15484292,19724852,20334896,21777278                                                                                                                                                                                                                                                                                                                        |
| 10218458,10404130,10492044,10547573,10547574,10666388,10672060,11059220,11559529,12064799,12133540,14691913,14966904,15378768,16163549,16270527,16490596,17393422,17447856,18184402,18224443,18484097,18609126,18841391,19084934,19096232,19160099,19760977,19822419,20334896,20397048,20525401,21275459,21559810547574,10666388,12064799,12133540,12771922,9778110 |
| 12064799,12133540                                                                                                                                                                                                                                                                                                                                                   |
| 10218458,10547573,10666388,11002215,11038303,11059220,12064799,12133540,12493027,12667381,12799636,15746045,16270527,16575401,18841391,19058005,19096232,19569046,20965966,7559076,9242335,9529014,981118117934831,9414655                                                                                                                                          |
| 11782383,15273739,15701848,17934831,20965966,9414655                                                                                                                                                                                                                                                                                                                |
| 9414655                                                                                                                                                                                                                                                                                                                                                             |
| 14654553,18841391,20965966                                                                                                                                                                                                                                                                                                                                          |
| 10666388,12667381,17366642                                                                                                                                                                                                                                                                                                                                          |
| 10666388,11782383,18484097                                                                                                                                                                                                                                                                                                                                          |
| 19167610,23442884                                                                                                                                                                                                                                                                                                                                                   |
| 10225440,15701848,                                                                                                                                                                                                                                                                                                                                                  |
| 20965966                                                                                                                                                                                                                                                                                                                                                            |
| 10225440                                                                                                                                                                                                                                                                                                                                                            |
| 12508351,12973852,14691913,15818729,15906946,17131485,17652530,18484097,18996365,19058005,20205286,2016998811                                                                                                                                                                                                                                                       |
| 12809678,15701848,16247479,16474375,16981245                                                                                                                                                                                                                                                                                                                        |
| 18104429,18158562,18570890,20682178                                                                                                                                                                                                                                                                                                                                 |
| 18723843,19203381,19569046,20530692                                                                                                                                                                                                                                                                                                                                 |
| 15273739,18723843,19203381                                                                                                                                                                                                                                                                                                                                          |
| 18482745                                                                                                                                                                                                                                                                                                                                                            |
| 20965966                                                                                                                                                                                                                                                                                                                                                            |
| 12957361,18723843,19626584                                                                                                                                                                                                                                                                                                                                          |
| 12957361,18478330,18723843,19626584                                                                                                                                                                                                                                                                                                                                 |
| 19626584                                                                                                                                                                                                                                                                                                                                                            |
| 10705241,12579213,17927838                                                                                                                                                                                                                                                                                                                                          |
| 16718772,17187227,18482745,18723843,21382870                                                                                                                                                                                                                                                                                                                        |
| 18723843                                                                                                                                                                                                                                                                                                                                                            |
| 11821786,16474375,18570890                                                                                                                                                                                                                                                                                                                                          |
| 12673424,14604892,19562509                                                                                                                                                                                                                                                                                                                                          |
| 14714615,1683872,16949912,17429689,18835621,19231580,19509001,21575498,22776619,23002344,2311724614966904                                                                                                                                                                                                                                                           |
| 20132559,21376060                                                                                                                                                                                                                                                                                                                                                   |
| 18510611,19569046,21409489                                                                                                                                                                                                                                                                                                                                          |

|                                                                                                        |
|--------------------------------------------------------------------------------------------------------|
| 16278805                                                                                               |
| 11782383                                                                                               |
| 11903579                                                                                               |
| 11751513,14716817,15014040,15154625,15682491,15814628,16949912,18184402,19865524,20478305,20946117,23  |
| 10340041,12708473,16435385,16630137,17972143,19594546,20549826,8187075,9006092,9041148                 |
| 14647420                                                                                               |
| 19175826,22328012                                                                                      |
| 22328012                                                                                               |
| 10873359,12692838,18174246,19958625                                                                    |
| 18723843                                                                                               |
| 15701848                                                                                               |
| 11782383,20965966                                                                                      |
| 10218458,10404130,10492044,10547573,10547574,10666388,10672060,11059220,11559529,12064799,12133540,14  |
| 691913,14966904,15378768,16163549,16270527,16490596,17393422,17447856,18184402,18224443,18484097,1860  |
| 9126,18841391,19084934,19096232,19160099,19760977,19822419,20334896,20397048,20525401,21275459,215598  |
| 10218458,10547573,10666388,11002215,11038303,11059220,12064799,12133540,12493027,12667381,12799636,15  |
| 746045,16270527,16575401,18841391,19058005,19096232,19569046,20965966,7559076,9242335,9529014,9811181  |
| 17934831,9414655                                                                                       |
| 12809678,15701848,16247479,16474375,16981245                                                           |
| 10225440,15701848,                                                                                     |
| 10037277,11680933,12460468,12579211,12679307,1282800,1317752,14991403,15017643,15073595,15647181,1681  |
| 6379,17094480,17431415,17516110,17896140,17922051,18199332,18224443,18397279,18483367,18544998,188356  |
| 21,18957060,19061514,19142899,19173907,19259093,19479974,19949675,20368841,20430735,20530692,20937558, |
| 11804739,12439914,12679906,15897574,16294196,17046193,17652530,18510611,18829507,19399343,20339947,20  |
| 18104429,18158562,18570890,20682178                                                                    |
| 16557436,16847924,16951228,17094412,17166265,17179985,17461470,17984117,18025805,18452596,19287200,19  |
| 12162407                                                                                               |
| 10861496,15701848,17229543                                                                             |
| 18006815                                                                                               |
| 18006815                                                                                               |
| 22490415                                                                                               |
| 1282800,14695137,15747170,15818728,16035620,16158248,17085651,17473187,19296249,19563076               |
| 12530000,12975018,15244514,15284183,15316940,15386366,15640503,15837757,15930032,16045580,16317430,16  |
| 10026754,10070308,10357403,10379858,10437615,10440683,10461065,10526273,10779624,10854553,10878459,10  |
| 965312,11061344,11197049,11223822,11244997,11506954,11579392,11819218,11819817,11957070,11978184,1213  |
| 1083,12173384,12174362,12378339,12433614,12453275,12460468,12493028,12509950,12647634,12668286,127084  |
| 73,12767510,12811205,12825129,12854133,12854174,12901801,14532971,14669355,14710231,15029262,15069709, |
| 15112337,15112366,15116331,15153787,15274366,15309707,15312686,15457582,15515423,15569052,15746037,15  |
| 864753,16004820,16086118,16115916,16124061,16179839,16495697,16557436,16761623,16810742,16847924,1694  |
| 8814,16998811,17085650,17094412,17094486,17096728,17111394,17143338,17171787,17224647,17262742,173429  |
| 99,17409493,17426061,17461470,17520388,17633783,17671399,17687613,17896140,17922682,17972143,17984117, |
| 18023552,18025805,18095080,18181047,18184402,18200665,18234057,18273500,18317966,18373164,18383582,18  |
| 452596,18506690,18516318,18609713,18972599,19173829,19173907,19287200,19296249,19419943,19496079,1956  |
| 10094558,10211998,10231415,10461060,10604738,10664629,10749913,11106237,11113859,11194192,11313896,11  |
| 564215,11598162,11665847,11684825,11705864,11706763,11782383,11783066,11856141,11920500,12060614,1208  |
| 0224,12121238,12209998,12210063,12216071,12414534,12439911,12444556,12448005,12460468,12520583,125484  |
| 20,12558744,12631658,12692837,12702045,12750281,12923325,12940439,12966349,1333788,14580691,14729585,1 |
| 4742272,14750169,14998854,15102685,15102690,15128072,1514246,15198362,15330201,15361706,15500652,1552  |
| 2555,15609397,15870832,15918205,16127748,16132582,16215948,16219136,16237750,16244541,16356709,164743  |
| 75,16610016,16821608,16929514,16969501,17066436,17139167,17201188,17224647,17299729,17380028,17512904, |
| 17545690,17549573,17589897,17634543,17652530,17671701,17786966,17852867,17883295,17908458,17914577,18  |
| 095267,18197935,18312357,18342503,18377425,18386788,18395897,18482459,18569997,18768510,18825309,1882  |
| 11564215,12414534,17512904,19107131,19309396,23752181                                                  |
| 15842637,16112005,16220299,20462599                                                                    |

|                                                                                                                                                                                                                                                                                                                                                                                                                                                                   |
|-------------------------------------------------------------------------------------------------------------------------------------------------------------------------------------------------------------------------------------------------------------------------------------------------------------------------------------------------------------------------------------------------------------------------------------------------------------------|
| 11098083,14562368,14604892,8952528                                                                                                                                                                                                                                                                                                                                                                                                                                |
| 11782383,14973074,15273739,15330800,16430945,17512904,17978572,19107131,21365014                                                                                                                                                                                                                                                                                                                                                                                  |
| 17229543,18413822                                                                                                                                                                                                                                                                                                                                                                                                                                                 |
| 12596061                                                                                                                                                                                                                                                                                                                                                                                                                                                          |
| 19491270,22691042                                                                                                                                                                                                                                                                                                                                                                                                                                                 |
| 10999748,11819490,11823976,11903578,12460468,14604892,14973074,15522165,15929171,16124061,16538217,16718824,16731602,16940985,17094486,17153464,17236757,17908458,18330957,18498066,19309396,19383080,19562509,19569980,19586554,19822020,20028745,20478305,20563765,20730428,21148629,21337552,21526499,216124                                                                                                                                                   |
| 19491270,21466361,22691042                                                                                                                                                                                                                                                                                                                                                                                                                                        |
| 12667324                                                                                                                                                                                                                                                                                                                                                                                                                                                          |
| 10340041,12708473,16435385,16630137,17972143,19594546,20549826,8187075,9006092,9041148                                                                                                                                                                                                                                                                                                                                                                            |
| 19351925                                                                                                                                                                                                                                                                                                                                                                                                                                                          |
| 14647420                                                                                                                                                                                                                                                                                                                                                                                                                                                          |
| 11234879,12136244,15033661,15501972,17200344,17634543,19341727,21105199,9331080                                                                                                                                                                                                                                                                                                                                                                                   |
| 12414534,19309396,22018628,23670240,23752181                                                                                                                                                                                                                                                                                                                                                                                                                      |
| 17299729,19107131,21274735,23752181                                                                                                                                                                                                                                                                                                                                                                                                                               |
| 1282800,14695137,15747170,15818728,16035620,16158248,17085651,17473187,19296249,19563076                                                                                                                                                                                                                                                                                                                                                                          |
| 17299729                                                                                                                                                                                                                                                                                                                                                                                                                                                          |
| 10080606,10526273,10839293,11234879,11821786,12353499,12794244,12809678,14669355,16310402,16509870,17096728,17187359,17262742,17270215,17562261,17640324,18341540,18484655,18687755,18936038,19550422,1956                                                                                                                                                                                                                                                        |
| 17270215,19550422,21777278,9139831                                                                                                                                                                                                                                                                                                                                                                                                                                |
| 17270215,19550422,9139831                                                                                                                                                                                                                                                                                                                                                                                                                                         |
| 10873359,12692838,18174246,19958625                                                                                                                                                                                                                                                                                                                                                                                                                               |
| 10398102,10873359,12353499,17096728,17187359,17562261                                                                                                                                                                                                                                                                                                                                                                                                             |
| 12414534,17297478,17512904,17886095,19107131,20005068,20405297,20737169,21104359                                                                                                                                                                                                                                                                                                                                                                                  |
| 14973074,19107131,19309396,22018628,22189617                                                                                                                                                                                                                                                                                                                                                                                                                      |
| 22018628                                                                                                                                                                                                                                                                                                                                                                                                                                                          |
| 12414534                                                                                                                                                                                                                                                                                                                                                                                                                                                          |
| 18622497                                                                                                                                                                                                                                                                                                                                                                                                                                                          |
| 11196187,18829507,19399343,20205286,20530692,20965966                                                                                                                                                                                                                                                                                                                                                                                                             |
| 17295679                                                                                                                                                                                                                                                                                                                                                                                                                                                          |
| 20334896,20525401,21858804                                                                                                                                                                                                                                                                                                                                                                                                                                        |
| 10218458,10404130,10492044,10547573,10547574,10666388,10672060,11059220,11559529,12064799,12133540,14691913,14966904,15378768,16163549,16270527,16490596,17393422,17447856,18184402,18224443,18484097,18609126,18841391,19084934,19096232,19160099,19760977,19822419,20334896,20397048,20525401,21275459,215598                                                                                                                                                   |
| 10547574,10666388,12064799,12133540,12771922,9778110                                                                                                                                                                                                                                                                                                                                                                                                              |
| 12064799,12133540                                                                                                                                                                                                                                                                                                                                                                                                                                                 |
| 10218458,10547573,10666388,11002215,11038303,11059220,12064799,12133540,12493027,12667381,12799636,15746045,16270527,16575401,18841391,19058005,19096232,19569046,20965966,7559076,9242335,9529014,9811181                                                                                                                                                                                                                                                        |
| 17934831,9414655                                                                                                                                                                                                                                                                                                                                                                                                                                                  |
| 10666388,12667381,17366642                                                                                                                                                                                                                                                                                                                                                                                                                                        |
| 10666388,11782383,18484097                                                                                                                                                                                                                                                                                                                                                                                                                                        |
| 19167610,23442884                                                                                                                                                                                                                                                                                                                                                                                                                                                 |
| 10218458,10547573,10695995,10718178,11197049,11463497,11521990,11745255,11903579,11932915,12417790,12794244,12872447,14647439,15036662,15069711,15586362,16121348,16289646,17166265,18497953,18751407,1905                                                                                                                                                                                                                                                        |
| 10218458,10223564,10404130,10666388,10692028,10779641,11002215,11038303,11042561,11147595,11358008,11903579,12097295,12239454,12451619,14654553,15645119,16121348,16480585,18841391,19096232,20334896,2155                                                                                                                                                                                                                                                        |
| 10705239,10779641,10830779,10861481,11146446,12060614,12194996,12210063,12448005,12460459,12514789,12608655,12632489,12692837,12717828,12824886,12890389,12894891,12973852,14691913,15240535,15330201,15352040,15459500,15498792,15526354,15612883,15818729,15859515,16474375,16518809,16534497,16619489,16821608,17058198,17074152,17139167,17460447,17652530,17671701,17914577,17971901,18395906,18484097,18622497,12060614,12448005,17652530,19399343,23504555 |
| 17685927                                                                                                                                                                                                                                                                                                                                                                                                                                                          |
| 21190721                                                                                                                                                                                                                                                                                                                                                                                                                                                          |
| 16824748,17909001,19366810                                                                                                                                                                                                                                                                                                                                                                                                                                        |

|                                                                                                                                                                                                                                              |
|----------------------------------------------------------------------------------------------------------------------------------------------------------------------------------------------------------------------------------------------|
| 16371352,17160944,20447678,20704706,20854473                                                                                                                                                                                                 |
| 20965966                                                                                                                                                                                                                                     |
| 20003385                                                                                                                                                                                                                                     |
| 12097295,14654553,15645119,16425372,20965966                                                                                                                                                                                                 |
| 19351925                                                                                                                                                                                                                                     |
| 14647420                                                                                                                                                                                                                                     |
| 11234879,12136244,15033661,15501972,17200344,17634543,19341727,21105199,9331080                                                                                                                                                              |
| 1282800,14695137,15747170,15818728,16035620,16158248,17085651,17473187,19296249,19563076                                                                                                                                                     |
| 10080606,10526273,10839293,11234879,11821786,12353499,12794244,12809678,14669355,16310402,16509870,17096728,17187359,17262742,17270215,17562261,17640324,18341540,18484655,18687755,18936038,19550422,195617270215,19550422,21777278,9139831 |
| 10873359,12692838,18174246,19958625                                                                                                                                                                                                          |
| 10398102,10873359,12353499,17096728,17187359,17562261                                                                                                                                                                                        |
| 11294777,23013936                                                                                                                                                                                                                            |
| 23013936                                                                                                                                                                                                                                     |
| 21190721                                                                                                                                                                                                                                     |
| 16824748,17909001,19366810                                                                                                                                                                                                                   |
| 23065444                                                                                                                                                                                                                                     |
| 23065444                                                                                                                                                                                                                                     |
| 11749695,14731134,18207460                                                                                                                                                                                                                   |
| 15865607                                                                                                                                                                                                                                     |
| 21466361,22691042                                                                                                                                                                                                                            |
| 11782383,20965966                                                                                                                                                                                                                            |
| 11782383,20965966                                                                                                                                                                                                                            |
| 11782383,20965966                                                                                                                                                                                                                            |
| 11782383,20965966                                                                                                                                                                                                                            |
| 11782383,20965966                                                                                                                                                                                                                            |
| 11782383,20965966                                                                                                                                                                                                                            |
| 11782383,20965966                                                                                                                                                                                                                            |
| 11782383,20965966                                                                                                                                                                                                                            |
| 11782383,20965966                                                                                                                                                                                                                            |
| 11782383,20965966                                                                                                                                                                                                                            |
| 11782383,20965966                                                                                                                                                                                                                            |
| 11782383,20965966                                                                                                                                                                                                                            |
| 11782383,20965966                                                                                                                                                                                                                            |
| 11782383,20965966                                                                                                                                                                                                                            |
| 11782383,20965966                                                                                                                                                                                                                            |
| 11782383,20965966                                                                                                                                                                                                                            |
| 11782383,20965966                                                                                                                                                                                                                            |
| 11782383,20965966                                                                                                                                                                                                                            |
| 11782383,20965966                                                                                                                                                                                                                            |
| 11782383,20965966                                                                                                                                                                                                                            |
| 19896696                                                                                                                                                                                                                                     |
| 11782383,20965966                                                                                                                                                                                                                            |
| 19491270,22691042                                                                                                                                                                                                                            |
| 22691042                                                                                                                                                                                                                                     |
| 21092330                                                                                                                                                                                                                                     |
| 20664982                                                                                                                                                                                                                                     |
| 20132559,21376060                                                                                                                                                                                                                            |
| 19491270,21466361,22691042                                                                                                                                                                                                                   |
| 11821786                                                                                                                                                                                                                                     |
| 10815895,12430182,17058198,17094900,18829507,19386249,19399343,20530692,20737169                                                                                                                                                             |
